# Supplementary material for: Blessed Are the Peacemakers
Source: MDPI journal article supplement (doi:10.3390/polym15081862), 2013-01-01
Supplement: s1 [file s1]

## Supporting information

Hierarchical emulsion-templated monoliths (polyHIPEs) as scaffolds for covalent immobilization of *P. acidilactici*

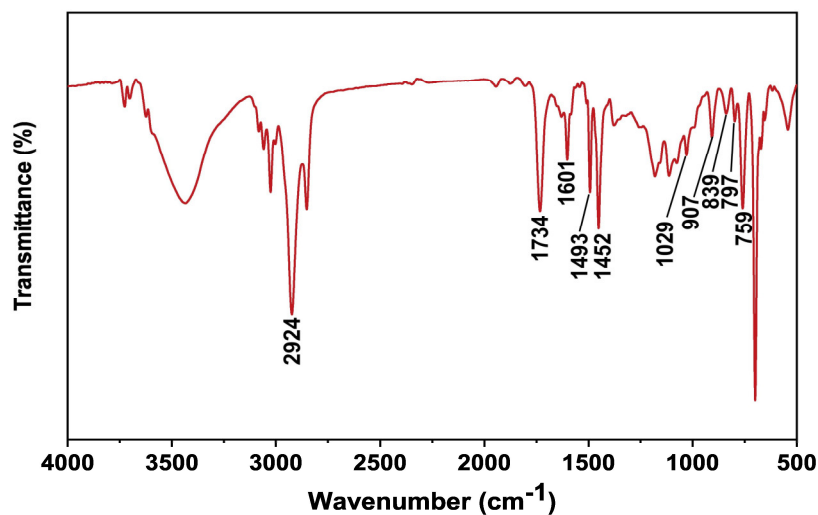

Figure S1. FT-IR spectrum of P(St-co-GMA) polyHIPE.

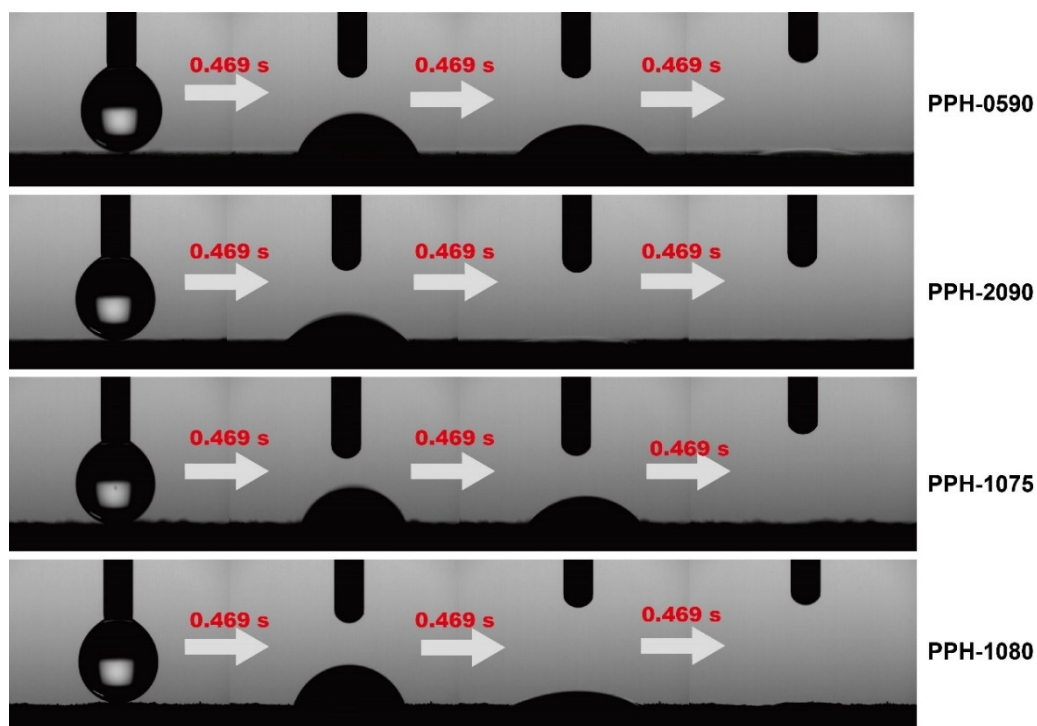

Figure S2. Water wettability of polyHIPE scaffolds of PHI-0590, PHI-2090, PHI-1075, PHI-1080.

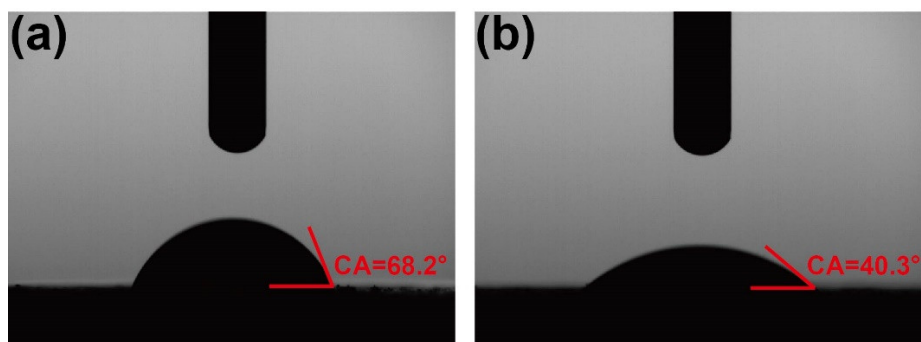

**Figure S3.** Water contact angle (at 0.469 s) of PHI-1090 before (a) and after (b) immobilizing *P. acidilactici*.

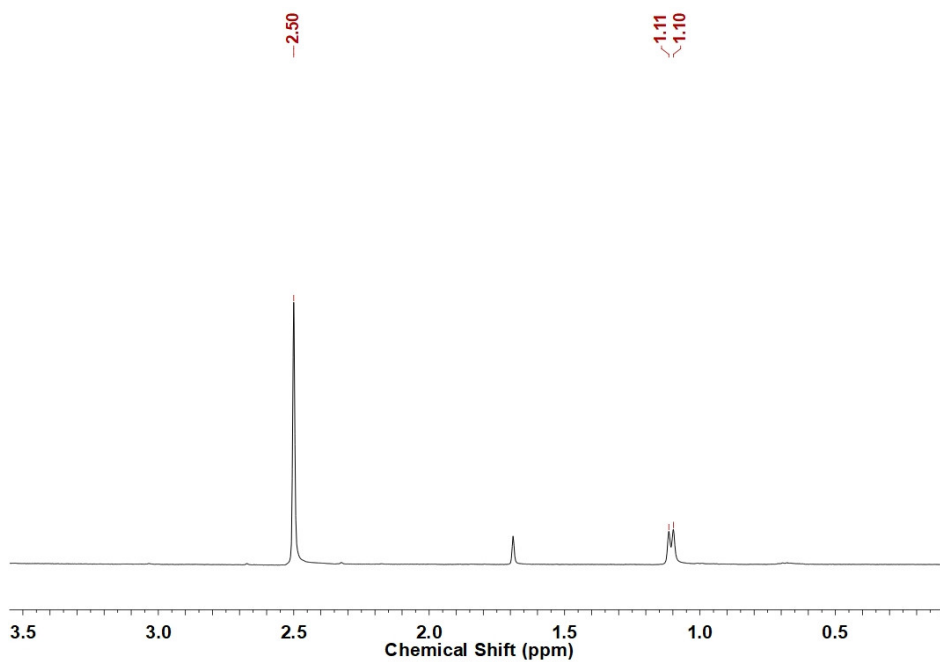

**Figure S4.** <sup>1</sup>H-NMR spectrum of L-lactic acid. The unimodal at  $\delta = 2.50$  is corresponding to DMSO-d<sub>6</sub> solvent.

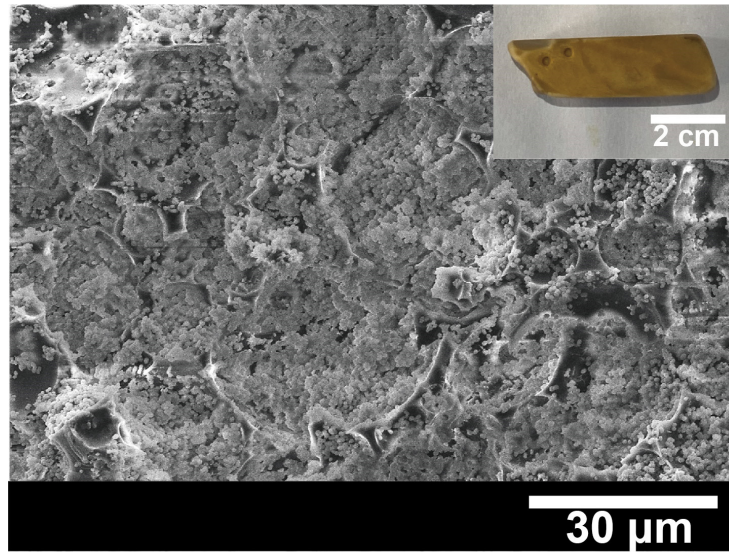

**Figure S5.** SEM image of *P. acidilactici* immobilized PHI-1090 after 10 batches fermentation. The inset is the corresponding PHI photographs.

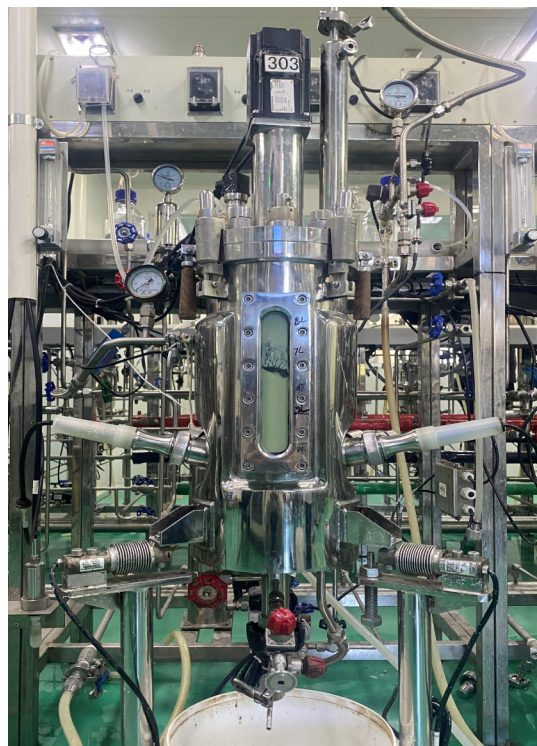

**Figure S6.** Photograph of *P. acidilactici* immobilized PHI scaffold fermenting in a fermenter.

**Table S1.** L-lactic acid yield by suspended *P. acidilactici* and *P. acidilactici* immobilized PHI-1090.

| Temperature | L-lactic acid of suspended <i>P. acidilactici</i> (g/kg) <sup>[a]</sup> | L-lactic acid of immobilized <i>P. acidilactici</i> (g/kg) <sup>[a]</sup> |
|-------------|-------------------------------------------------------------------------|---------------------------------------------------------------------------|
| 38 °C       | 26.1±0.9                                                                | 32.0±1.1                                                                  |
| 40 °C       | 28.0±0.7                                                                | 28.7±1.2                                                                  |
| 42 °C       | 29.1±1.5                                                                | 34.0±1.0                                                                  |
| 44 °C       | 23.8±0.9                                                                | 24.3±0.6                                                                  |
| 46 °C       | 26.6±0.8                                                                | 27.6±1.0                                                                  |
| 48 °C       | 27.7±1.4                                                                | 28.1±0.6                                                                  |

[a] Ratio of L-lactic acid mass to fermentation medium weight.

**Table S2.** L-lactic acid yield by *P. acidilactici* immobilized on polyHIPEs with different structure.

| Sample                           | L-lactic acid of immobilized <i>P. acidilactici</i> (g/kg) <sup>[a]</sup> |
|----------------------------------|---------------------------------------------------------------------------|
| Suspended <i>P. acidilactici</i> | 29.1±1.2                                                                  |
| PHI-0590                         | 29.6±0.7                                                                  |
| PHI-1090                         | 34.0±1.0                                                                  |
| PHI-2090                         | 28.9±1.5                                                                  |
| PHI-1075                         | 31.7±0.8                                                                  |
| PHI-1080                         | 32.1±0.9                                                                  |

[a] Ratio of L-lactic acid mass to fermentation medium weight.

**Table S3.** L-lactic acid yield enhancement using other scaffolds for cell immobilization.

| Scaffold                         | Biocatalyst                      | L-lactic acid yield enhancement <sup>[a]</sup> | References |
|----------------------------------|----------------------------------|------------------------------------------------|------------|
| SA-PVA gel                       | <i>Lactobacillus pentosus</i>    | 11.3%                                          | [1]        |
| Apple pomace                     | <i>Pediococcus acidilactici</i>  | 15.3%                                          | [2]        |
| Mesoporous silica-based material | <i>Lactobacillus rhamnosus</i>   | 4.1%                                           | [3]        |
| Microtube array membrane         | <i>Lactobacillus acidophilus</i> | 7.2%                                           | [4]        |

[a] Increased percentage of L-lactic acid yield by immobilized cells compared to free cells.

**Table S4.** L-lactic acid yield and relative lactic acid yield of suspended *P. acidilactici*

| Cycle number | L-lactic acid yield by suspended <i>P. acidilactici</i> (g/kg) <sup>[a]</sup> | Relative lactic acid yield by suspended <i>P. acidilactici</i> (%) |
|--------------|-------------------------------------------------------------------------------|--------------------------------------------------------------------|
| 1            | 30.7±0.2                                                                      | 100                                                                |
| 2            | 28.8±1.3                                                                      | 93.5                                                               |
| 3            | 28.2±0.8                                                                      | 91.8                                                               |
| 4            | 27.6±1.5                                                                      | 89.9                                                               |
| 5            | 28.9±1.7                                                                      | 93.9                                                               |
| 6            | 24.8±0.9                                                                      | 80.8                                                               |
| 7            | 30.3±1.6                                                                      | 98.5                                                               |
| 8            | 29.5±0.8                                                                      | 95.9                                                               |
| 9            | 29.6±1.6                                                                      | 96.4                                                               |
| 10           | 28.7±1.9                                                                      | 93.3                                                               |

[a] Ratio of L-lactic acid mass to fermentation medium weight.

## Reference

1. Wang, J.; Huang, J.; Guo, H.; Jiang, S.; Zhang, J.; Ning, Y.; Fang, M.; Liu, S. Optimization of immobilization conditions for *Lactobacillus pentosus* cells. *Bioprocess Biosyst. Eng.* **2020**, *43*, 1071-1079, doi:10.1007/s00449-020-02305-9.
2. Bartkiene, E.; Vizbickiene, D.; Bartkevics, V.; Pugajeva, I.; Krungleviciute, V.; Zadeike, D.; Zavistanaviciute, P.; Juodeikiene, G. Application of *Pediococcus acidilactici* LUHS29 immobilized in apple pomace matrix for high value wheat-barley sourdough bread. *LWT Food Sci. Technol.* **2017**, *83*, 157-164, doi:10.1016/j.lwt.2017.05.010.
3. Zhao, Z.; Xie, X.; Wang, Z.; Tao, Y.; Niu, X.; Huang, X.; Liu, L.; Li, Z. Immobilization of *Lactobacillus rhamnosus* in mesoporous silica-based material: An efficiency continuous cell-recycle fermentation system for lactic acid production. *J. Biosci. Bioeng.* **2016**, *121*, 645-651, doi:10.1016/j.jbiosc.2015.11.010.
4. Chen, C.-C.; Lan, C.-C.; Pan, C.-L.; Huang, M.-Y.; Chew, C.-H.; Hung, C.-C.; Chen, P.-H.; Lin, H.-T.V. Repeated-batch lactic acid fermentation using a novel bacterial immobilization technique based on a microtube array membrane. *Process Biochem.* **2019**, *87*, 25-32, doi:10.1016/j.procbio.2019.09.016.
